# Supplementary material for: Toward the Discovery of a Novel Class of Leads for High Altitude Disorders by Virtual Screening and Molecular Dynamics Approaches Targeting Carbonic Anhydrase
Source: MDPI journal article supplement (doi:10.3390/ijms23095054), 2022-05-02
Supplement: s1 [file s1]

## Supplementary Information

### **Toward the Discovery of a Novel Class of leads for high altitude disorders by Virtual Screening and molecular dynamics Approaches Targeting carbonic anhydrase**

Amena Ali<sup>1,2,\*</sup>, Abuzer Ali<sup>3</sup>, Musarrat Husain Warsi<sup>4</sup>, Mohammad Akhlaquer Rahman<sup>4</sup>, Mohamed Jawed Ahsan<sup>5</sup> and Faizul Azam<sup>6</sup>

<sup>1</sup> *High Altitude Research Center, Taif University, P.O. Box 11099, Taif 21944, Saudi Arabia; amrathore@tu.edu.sa*

<sup>2</sup> *Department of Pharmaceutical Chemistry, College of Pharmacy, Taif University, P.O. Box 11099, Taif 21944, Saudi Arabia; amrathore@tu.edu.sa*

<sup>3</sup> *Department of Pharmacognosy, College of Pharmacy, Taif University, P.O. Box 11099, Taif 21944, Saudi Arabia; abuali@tu.edu.sa*

<sup>4</sup> *Department of Pharmaceutics and Industrial Pharmacy, College of Pharmacy, Taif University, P.O. Box 11099, Taif 21944, Saudi Arabia; mvarsi@tu.edu.sa (MHW); mrahman@tu.edu.sa (MAR)*

<sup>5</sup> *Department of Pharmaceutical Chemistry, Maharishi Arvind College of Pharmacy, Jaipur, Rajasthan 302 039, India; jawedpharma@gmail.com*

<sup>6</sup> *Department of Pharmaceutical Chemistry & Pharmacognosy, Unaizah College of Pharmacy, Qassim University, Uniazah 51911, Saudi Arabia; f.azam@qu.edu.sa*

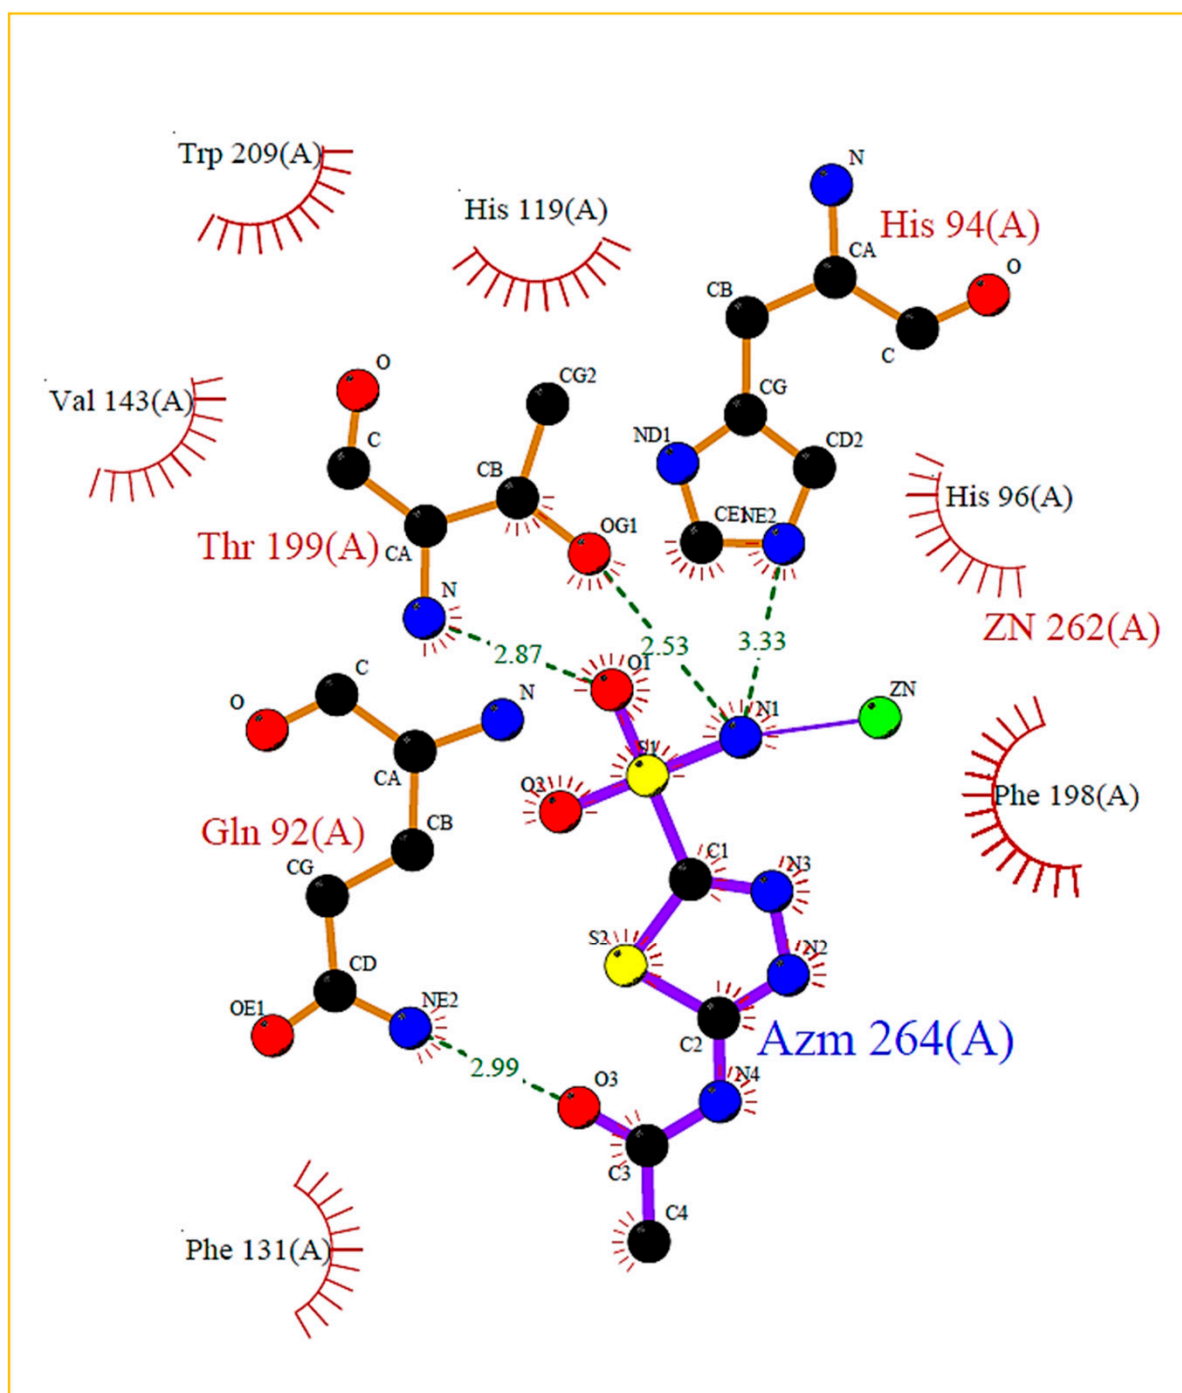

**Figure S1.** Ligplot diagram of co-crystallized ligand acetazolamide (PDB: 1YDB).

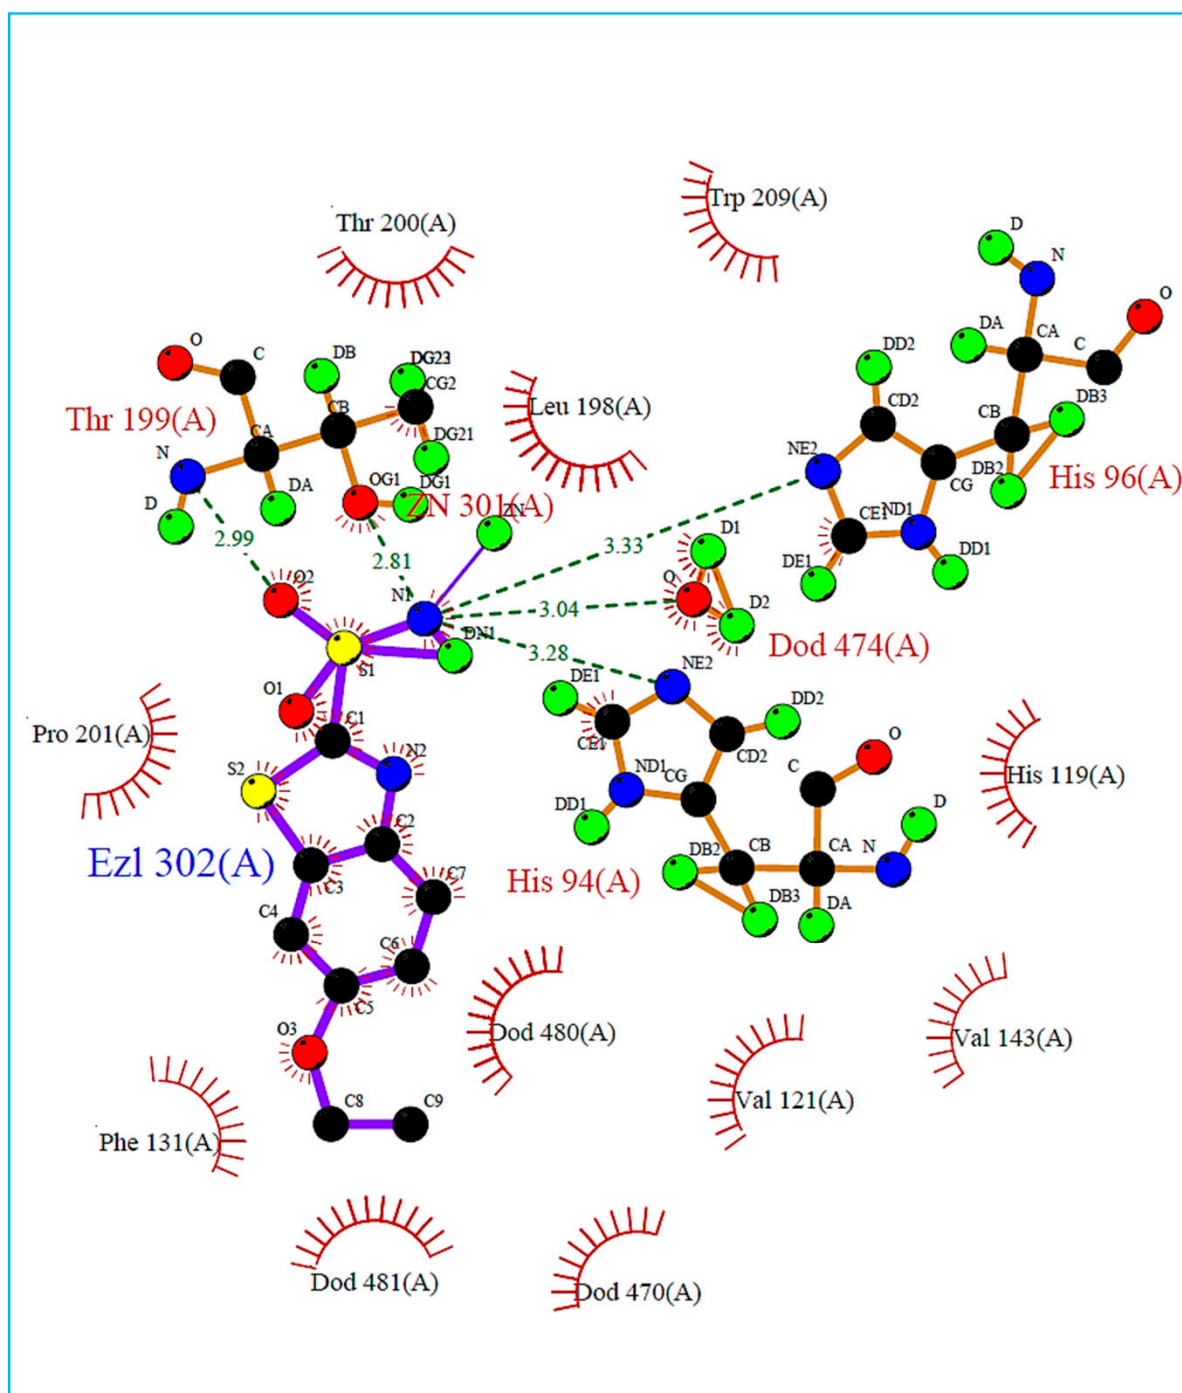

**Figure S2.** Ligplot diagram of co-crystallized ligand ethoxzolamide (PDB: 6BCC).



**Table S1.** Carbonic anhydrase inhibitory activity of acetazolamide against different isoforms.

| <b>SN</b> | <b>Target</b>         | <b>Ki (nM)</b> | <b>References</b>             |
|-----------|-----------------------|----------------|-------------------------------|
| 1         | Carbonic anhydrase-1  | 800            | Duffel et al, 1986 [1]        |
| 2         | Carbonic anhydrase-2  | 0.012          | Carta et al, 2016 [2]         |
| 3         | Carbonic anhydrase-3  | 200000         | Temperini et al, 2008 [3]     |
| 4         | Carbonic anhydrase-4  | 12             | Scozzafava et al, 2000 [4]    |
| 5         | Carbonic anhydrase-7  | 2.5            | Vullo et al, 2005 [5]         |
| 6         | Carbonic anhydrase-12 | 5.6            | Guzel-Akdemir et al, 2013 [6] |
| 7         | Carbonic anhydrase-14 | 41             | Temperini et al, 2008 [7]     |

**Table S2.** Top-10 hits obtained from 1,3,4-thiadiazole-based pharmacophore.

| Pharmacophore                                                                       | Top-10 hits  | Chemical structure                                                                   | Docking score |
|-------------------------------------------------------------------------------------|--------------|--------------------------------------------------------------------------------------|---------------|
| 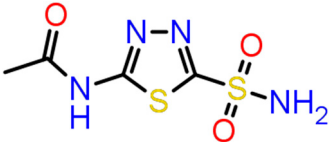 | ZINC12336992 |    | -9.0          |
|                                                                                     | ZINC17094775 |    | -8.8          |
|                                                                                     | ZINC23767494 |    | -8.3          |
|                                                                                     | ZINC13095340 |   | -8.3          |
|                                                                                     | ZINC16598965 |  | -8.2          |
|                                                                                     | ZINC56363882 |  | -8.1          |
|                                                                                     | ZINC32892923 |  | -7.9          |
|                                                                                     | ZINC25132072 |  | -7.9          |
|                                                                                     | ZINC48332299 |  | -7.9          |
|                                                                                     | ZINC6977130  |  | -7.9          |

**Table S3.** Top-10 hits obtained from 1,3-benzothiazole-based pharmacophore.

| Pharmacophore                                                                       | Top-10 hits   | Chemical structure                                                                   | Docking score |
|-------------------------------------------------------------------------------------|---------------|--------------------------------------------------------------------------------------|---------------|
| 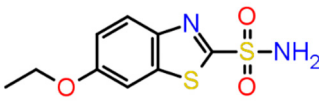 | ZINC24751284  |    | -9.0          |
|                                                                                     | ZINC32809300  |    | -8.6          |
|                                                                                     | ZINC23318431  |    | -8.5          |
|                                                                                     | ZINC4090104   |    | -8.4          |
|                                                                                     | ZINC217474540 |    | -8.3          |
|                                                                                     | ZINC9724717   |  | -8.3          |
|                                                                                     | ZINC58168621  |  | -8.3          |
|                                                                                     | ZINC4088326   |  | -8.2          |
|                                                                                     | ZINC46034715  |  | -8.1          |
|                                                                                     | ZINC95443933  |  | -8.1          |

**Table S4.** Top-10 hits screened from 1,2,5-oxadiazole-based pharmacophore.

| Pharmacophore                                                                       | Top-10 hits    | Chemical structure                                                                   | Docking score |
|-------------------------------------------------------------------------------------|----------------|--------------------------------------------------------------------------------------|---------------|
|                                                                                     | ZINC58324738   | 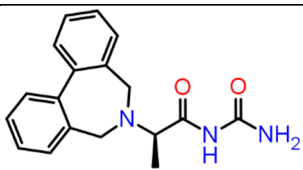   | -8.9          |
|                                                                                     | ZINC7016498    |    | -8.3          |
|                                                                                     | ZINC4704625    |    | -7.7          |
|                                                                                     | ZINC1506420260 |   | -7.6          |
|  | ZINC5669913    |  | -7.6          |
|                                                                                     | ZINC12819573   |  | -7.5          |
|                                                                                     | ZINC14093674   |  | -7.5          |
|                                                                                     | ZINC04624732   |  | -7.5          |
|                                                                                     | ZINC253405853  |  | -7.1          |
|                                                                                     | ZINC16399055   |  | -7.0          |



**Table S5.** Cartesian coordinates (Å) of ZINC12336992 after DFT optimization.

| Atom Number | Element | X         | Y         | Z         |
|-------------|---------|-----------|-----------|-----------|
| 1           | C       | -3.241823 | 6.117653  | 11.580995 |
| 2           | N       | -3.706936 | 4.955625  | 12.363729 |
| 3           | C       | -3.859764 | 5.085262  | 13.716365 |
| 4           | O       | -3.497037 | 6.087488  | 14.312599 |
| 5           | C       | -4.115516 | 3.819206  | 11.508259 |
| 6           | C       | -3.549596 | 4.195466  | 10.133870 |
| 7           | C       | -3.629627 | 5.729345  | 10.133178 |
| 8           | C       | -1.764805 | 6.364687  | 11.752075 |
| 9           | N       | -0.912924 | 5.327159  | 12.031795 |
| 10          | N       | 0.344838  | 5.843932  | 12.143054 |
| 11          | C       | 0.336708  | 7.182560  | 11.834451 |
| 12          | N       | 1.446948  | 7.893019  | 11.818236 |
| 13          | C       | 2.582949  | 7.227919  | 12.157259 |
| 14          | C       | 3.835876  | 8.067032  | 12.132184 |
| 15          | C       | 2.651966  | 5.880841  | 12.517719 |
| 16          | C       | 3.940575  | 5.199993  | 12.900041 |
| 17          | C       | 1.462921  | 5.076989  | 12.535375 |
| 18          | C       | -1.033194 | 7.511558  | 11.580070 |
| 19          | O       | 1.291198  | 3.895876  | 12.831541 |
| 20          | C       | -4.433987 | 3.917261  | 14.481673 |
| 21          | C       | -5.734730 | 3.449954  | 14.311185 |
| 22          | F       | -6.511944 | 4.013252  | 13.352909 |
| 23          | C       | -6.276339 | 2.443034  | 15.087772 |
| 24          | C       | -5.503022 | 1.875372  | 16.101678 |
| 25          | C       | -4.191991 | 2.325540  | 16.298279 |
| 26          | C       | -3.674625 | 3.344586  | 15.507315 |
| 27          | C       | -6.144161 | 0.777253  | 16.912955 |
| 28          | N       | -5.539901 | 0.476986  | 18.104795 |
| 29          | H       | -6.022279 | -0.188447 | 18.689789 |
| 30          | H       | -4.933917 | 1.138473  | 18.561206 |
| 31          | O       | -7.130944 | 0.185194  | 16.514968 |
| 32          | H       | -3.761881 | 7.016096  | 11.917793 |
| 33          | H       | -3.714792 | 2.879922  | 11.894550 |
| 34          | H       | -5.204379 | 3.741307  | 11.473027 |
| 35          | H       | -2.510009 | 3.869706  | 10.043640 |
| 36          | H       | -4.116873 | 3.739621  | 9.320911  |
| 37          | H       | -4.656362 | 6.055538  | 9.943677  |
| 38          | H       | -2.980557 | 6.200289  | 9.394899  |
| 39          | H       | -1.100372 | 4.483124  | 12.556951 |
| 40          | H       | 4.586770  | 7.643022  | 11.458014 |
| 41          | H       | 4.294344  | 8.122558  | 13.125157 |
| 42          | H       | 3.587678  | 9.074594  | 11.802210 |
| 43          | H       | 3.731635  | 4.175032  | 13.206699 |
| 44          | H       | 4.443966  | 5.711271  | 13.727147 |
| 45          | H       | 4.647072  | 5.165439  | 12.062960 |
| 46          | H       | -1.400818 | 8.487618  | 11.312106 |
| 47          | H       | -7.288872 | 2.098214  | 14.922082 |
| 48          | H       | -3.558351 | 1.871711  | 17.050769 |
| 49          | H       | -2.669120 | 3.710871  | 15.677092 |

**Table S6.** Bond parameters of ZINC12336992 after DFT optimization.

| No. | Definition   | Bond length<br>(in Å) | No. | Definition        | Bond angles<br>(in °) |
|-----|--------------|-----------------------|-----|-------------------|-----------------------|
| 1   | B (N1, C0)   | 1.48                  | 1   | A (C6, C0, C7)    | 113.12                |
| 2   | B (C2, N1)   | 1.37                  | 2   | A (C7, C0, H31)   | 107.28                |
| 3   | B (O3, C2)   | 1.22                  | 3   | A (N1, C0, C6)    | 102.68                |
| 4   | B (C4, N1)   | 1.48                  | 4   | A (N1, C0, C7)    | 112.18                |
| 5   | B (C5, C4)   | 1.53                  | 5   | A (N1, C0, H31)   | 109.53                |
| 6   | B (C6, C5)   | 1.54                  | 6   | A (C6, C0, H31)   | 112.07                |
| 7   | B (C6, C0)   | 1.55                  | 7   | A (C2, N1, C4)    | 127.86                |
| 8   | B (C7, C0)   | 1.51                  | 8   | A (C0, N1, C4)    | 112.64                |
| 9   | B (N8, C7)   | 1.37                  | 9   | A (C0, N1, C2)    | 119.02                |
| 10  | B (N9, N8)   | 1.36                  | 10  | A (N1, C2, O3)    | 121.84                |
| 11  | B (C10, N9)  | 1.37                  | 11  | A (O3, C2, C19)   | 120.02                |
| 12  | B (N11, C10) | 1.32                  | 12  | A (N1, C2, C19)   | 118.07                |
| 13  | B (C12, N11) | 1.36                  | 13  | A (C5, C4, H33)   | 110.89                |
| 14  | B (C13, C12) | 1.51                  | 14  | A (H32, C4, H33)  | 108.42                |
| 15  | B (C14, C12) | 1.40                  | 15  | A (N1, C4, H33)   | 110.41                |
| 16  | B (C15, C14) | 1.51                  | 16  | A (N1, C4, C5)    | 103.17                |
| 17  | B (C16, C14) | 1.44                  | 17  | A (C5, C4, H32)   | 113.13                |
| 18  | B (C16, N9)  | 1.41                  | 18  | A (N1, C4, H32)   | 110.78                |
| 19  | B (C17, C10) | 1.43                  | 19  | A (H34, C5, H35)  | 107.96                |
| 20  | B (C17, C7)  | 1.37                  | 20  | A (C4, C5, C6)    | 103.07                |
| 21  | B (O18, C16) | 1.23                  | 21  | A (C6, C5, H35)   | 112.94                |
| 22  | B (C19, C2)  | 1.51                  | 22  | A (C4, C5, H34)   | 110.60                |
| 23  | B (C20, C19) | 1.39                  | 23  | A (C6, C5, H34)   | 110.31                |
| 24  | B (F21, C20) | 1.36                  | 24  | A (C4, C5, H35)   | 111.93                |
| 25  | B (C22, C20) | 1.38                  | 25  | A (H36, C6, H37)  | 108.23                |
| 26  | B (C23, C22) | 1.40                  | 26  | A (C5, C6, H37)   | 113.62                |
| 27  | B (C24, C23) | 1.40                  | 27  | A (C0, C6, H37)   | 112.08                |
| 28  | B (C25, C24) | 1.39                  | 28  | A (C0, C6, C5)    | 103.71                |
| 29  | B (C25, C19) | 1.40                  | 29  | A (C5, C6, H36)   | 110.29                |
| 30  | B (C26, C23) | 1.51                  | 30  | A (C0, C6, H36)   | 108.80                |
| 31  | B (N27, C26) | 1.37                  | 31  | A (N8, C7, C17)   | 109.08                |
| 32  | B (H28, N27) | 1.01                  | 32  | A (C0, C7, C17)   | 130.22                |
| 33  | B (H29, N27) | 1.01                  | 33  | A (C0, C7, N8)    | 120.52                |
| 34  | B (O30, C26) | 1.22                  | 34  | A (C7, N8, N9)    | 107.62                |
| 35  | B (H31, C0)  | 1.09                  | 35  | A (N9, N8, H38)   | 116.39                |
| 36  | B (H32, C4)  | 1.09                  | 36  | A (C7, N8, H38)   | 128.47                |
| 37  | B (H33, C4)  | 1.09                  | 37  | A (N8, N9, C10)   | 110.20                |
| 38  | B (H34, C5)  | 1.09                  | 38  | A (C10, N9, C16)  | 126.63                |
| 39  | B (H35, C5)  | 1.09                  | 39  | A (N8, N9, C16)   | 123.17                |
| 40  | B (H36, C6)  | 1.09                  | 40  | A (N9, C10, N11)  | 121.53                |
| 41  | B (H37, C6)  | 1.09                  | 41  | A (N11, C10, C17) | 132.83                |
| 42  | B (H38, N8)  | 1.01                  | 42  | A (N9, C10, C17)  | 105.63                |
| 43  | B (H39, C13) | 1.09                  | 43  | A (C10, N11, C12) | 115.92                |
| 44  | B (H40, C13) | 1.10                  | 44  | A (C13, C12, C14) | 120.00                |
| 45  | B (H41, C13) | 1.09                  | 45  | A (N11, C12, C14) | 125.29                |
| 46  | B (H42, C15) | 1.09                  | 46  | A (N11, C12, C13) | 114.70                |

|    |              |      |    |                   |        |
|----|--------------|------|----|-------------------|--------|
| 47 | B (H43, C15) | 1.09 | 47 | A (H40, C13, H41) | 108.86 |
| 48 | B (H44, C15) | 1.10 | 48 | A (H39, C13, H41) | 109.16 |
| 49 | B (H45, C17) | 1.08 | 49 | A (C12, C13, H41) | 109.30 |
| 50 | B (H46, C22) | 1.08 | 50 | A (C12, C13, H39) | 111.38 |
| 51 | B (H47, C24) | 1.08 | 51 | A (H39, C13, H40) | 106.91 |
| 52 | B (H48, C25) | 1.08 | 52 | A (C12, C13, H40) | 111.16 |
|    |              |      | 53 | A (C12, C14, C15) | 122.94 |
|    |              |      | 54 | A (C12, C14, C16) | 120.17 |
|    |              |      | 55 | A (C15, C14, C16) | 116.89 |
|    |              |      | 56 | A (H43, C15, H44) | 107.18 |
|    |              |      | 57 | A (H42, C15, H44) | 107.99 |
|    |              |      | 58 | A (H42, C15, H43) | 108.34 |
|    |              |      | 59 | A (C14, C15, H43) | 111.95 |
|    |              |      | 60 | A (C14, C15, H42) | 109.41 |
|    |              |      | 61 | A (C14, C15, H44) | 111.82 |
|    |              |      | 62 | A (C14, C16, O18) | 131.04 |
|    |              |      | 63 | A (N9, C16, O18)  | 118.57 |
|    |              |      | 64 | A (N9, C16, C14)  | 110.39 |
|    |              |      | 65 | A (C7, C17, C10)  | 107.22 |
|    |              |      | 66 | A (C10, C17, H45) | 125.39 |
|    |              |      | 67 | A (C7, C17, H45)  | 127.39 |
|    |              |      | 68 | A (C20, C19, C25) | 117.35 |
|    |              |      | 69 | A (C2, C9, C25)   | 118.81 |
|    |              |      | 70 | A (C2, C9, C20)   | 123.56 |
|    |              |      | 71 | A (F21, C20, C22) | 118.36 |
|    |              |      | 72 | A (C19, C20, C22) | 122.80 |
|    |              |      | 73 | A (C19, C20, F21) | 118.84 |
|    |              |      | 74 | A (C23, C22, H46) | 119.99 |
|    |              |      | 75 | A (C20, C22, H46) | 120.84 |
|    |              |      | 76 | A (C20, C22, C23) | 119.16 |
|    |              |      | 77 | A (C22, C23, C26) | 116.83 |
|    |              |      | 78 | A (C24, C23, C26) | 123.82 |
|    |              |      | 79 | A (C22, C23, C24) | 119.34 |
|    |              |      | 80 | A (C23, C24, H47) | 120.70 |
|    |              |      | 81 | A (C25, C24, H47) | 118.99 |
|    |              |      | 82 | A (C23, C24, C25) | 120.29 |
|    |              |      | 83 | A (C24, C25, H48) | 120.27 |
|    |              |      | 84 | A (C19, C25, H48) | 118.70 |
|    |              |      | 85 | A (C19, C25, C24) | 121.02 |
|    |              |      | 86 | A (N27, C26, O30) | 122.37 |
|    |              |      | 87 | A (C23, C26, O30) | 121.51 |
|    |              |      | 88 | A (C23, C26, N27) | 116.11 |
|    |              |      | 89 | A (H28, N27, H29) | 117.29 |
|    |              |      | 90 | A (C26, N27, H29) | 121.07 |
|    |              |      | 91 | A (C26, N27, H28) | 115.99 |

**Table S7.** Cartesian coordinates (Å) of ZINC24751284 after DFT optimization.

| Atom Number | Element | X         | Y         | Z         |
|-------------|---------|-----------|-----------|-----------|
| 1           | C       | -5.072096 | 2.042018  | 16.310934 |
| 2           | C       | -3.825848 | 2.677710  | 16.233932 |
| 3           | C       | -3.825489 | 3.918686  | 15.642094 |
| 4           | C       | -4.986218 | 4.522452  | 15.143721 |
| 5           | N       | -4.585585 | 5.751019  | 14.638263 |
| 6           | C       | -3.218720 | 5.900902  | 14.811162 |
| 7           | O       | -2.521030 | 6.819968  | 14.489912 |
| 8           | C       | -6.217954 | 3.888519  | 15.237290 |
| 9           | O       | -2.753472 | 4.753139  | 15.444687 |
| 10          | C       | -6.244838 | 2.625270  | 15.832909 |
| 11          | S       | -5.149148 | 0.405023  | 17.038179 |
| 12          | O       | -6.505422 | 0.203061  | 17.538563 |
| 13          | O       | -3.964062 | 0.241834  | 17.874756 |
| 14          | N       | -4.960403 | -0.622709 | 15.707652 |
| 15          | H       | -4.105902 | -1.161583 | 15.799598 |
| 16          | H       | -5.774486 | -1.219916 | 15.610018 |
| 17          | C       | -5.411276 | 6.766833  | 13.989016 |
| 18          | C       | -5.133752 | 6.857484  | 12.485987 |
| 19          | C       | -6.188731 | 7.718611  | 11.793486 |
| 20          | N       | -5.916971 | 8.078639  | 10.498703 |
| 21          | C       | -6.788644 | 8.804120  | 9.643889  |
| 22          | C       | -6.173608 | 9.011813  | 8.404290  |
| 23          | C       | -6.839236 | 9.693633  | 7.397281  |
| 24          | C       | -8.131454 | 10.169156 | 7.635377  |
| 25          | C       | -8.732882 | 9.961463  | 8.875315  |
| 26          | C       | -4.774746 | 8.442721  | 8.414752  |
| 27          | C       | -8.074696 | 9.278482  | 9.900850  |
| 28          | C       | -4.719451 | 7.643394  | 9.736383  |
| 29          | O       | -7.215804 | 8.040926  | 12.374465 |
| 30          | H       | -2.929338 | 2.226276  | 16.636488 |
| 31          | H       | -7.127702 | 4.347618  | 14.872316 |
| 32          | H       | -7.183417 | 2.098702  | 15.947243 |
| 33          | H       | -6.457244 | 6.525679  | 14.167157 |
| 34          | H       | -5.214552 | 7.728239  | 14.466549 |
| 35          | H       | -4.127155 | 7.248900  | 12.326532 |
| 36          | H       | -5.155118 | 5.853847  | 12.042804 |
| 37          | H       | -6.362031 | 9.856619  | 6.436470  |
| 38          | H       | -8.664546 | 10.700891 | 6.855591  |
| 39          | H       | -9.735079 | 10.334689 | 9.054990  |
| 40          | H       | -4.569984 | 7.804069  | 7.552522  |
| 41          | H       | -4.028964 | 9.244496  | 8.409597  |
| 42          | H       | -8.534893 | 9.117429  | 10.862844 |
| 43          | H       | -3.809040 | 7.846247  | 10.300009 |
| 44          | H       | -4.772012 | 6.565632  | 9.550424  |

**Table S8.** Bond parameters of ZINC24751284 after DFT optimization.

| No. | Definition   | Bond length<br>(in Å) | No. | Definition        | Bond angles<br>(in °) |
|-----|--------------|-----------------------|-----|-------------------|-----------------------|
| 1   | B (C1, C0)   | 1.40                  | 1   | A (C1, C0, S10)   | 118.34                |
| 2   | B (C2, C1)   | 1.37                  | 2   | A (C1, C0, C9)    | 122.65                |
| 3   | B (C3, C2)   | 1.40                  | 3   | A (C9, C0, S10)   | 119.00                |
| 4   | B (N4, C3)   | 1.39                  | 4   | A (C0, C1, H29)   | 121.84                |
| 5   | B (C5, N4)   | 1.39                  | 5   | A (C2, C1, H29)   | 122.47                |
| 6   | B (O6, C5)   | 1.20                  | 6   | A (C0, C1, C2)    | 115.68                |
| 7   | B (C7, C3)   | 1.39                  | 7   | A (C3, C2, O8)    | 109.52                |
| 8   | B (O8, C5)   | 1.39                  | 8   | A (C1, C2, O8)    | 127.64                |
| 9   | B (O8, C2)   | 1.37                  | 9   | A (C1, C2, C3)    | 122.84                |
| 10  | B (C9, C7)   | 1.40                  | 10  | A (C2, C3, N4)    | 105.79                |
| 11  | B (C9, C0)   | 1.39                  | 11  | A (N4, C3, C7)    | 133.23                |
| 12  | B (S10, C0)  | 1.79                  | 12  | A (C2, C3, C7)    | 120.97                |
| 13  | B (O11, S10) | 1.46                  | 13  | A (C5, N4, C16)   | 122.52                |
| 14  | B (O12, S10) | 1.46                  | 14  | A (C3, N4, C5)    | 109.58                |
| 15  | B (N13, S10) | 1.69                  | 15  | A (C3, N4, C16)   | 127.90                |
| 16  | B (H14, N13) | 1.01                  | 16  | A (N4, C5, O8)    | 107.30                |
| 17  | B (H15, N13) | 1.01                  | 17  | A (N4, C5, O6)    | 128.61                |
| 18  | B (C16, N4)  | 1.46                  | 18  | A (O6, C5, O8)    | 124.09                |
| 19  | B (C17, C16) | 1.53                  | 19  | A (C3, C7, H30)   | 121.95                |
| 20  | B (C18, C17) | 1.53                  | 20  | A (C9, C7, H30)   | 120.74                |
| 21  | B (N19, C18) | 1.37                  | 21  | A (C3, C7, C9)    | 117.30                |
| 22  | B (C20, N19) | 1.42                  | 22  | A (C2, O8, C5)    | 107.81                |
| 23  | B (C21, C20) | 1.40                  | 23  | A (C7, C9, H31)   | 120.11                |
| 24  | B (C22, C21) | 1.39                  | 24  | A (C0, C9, H31)   | 119.32                |
| 25  | B (C23, C22) | 1.40                  | 25  | A (C0, C9, C7)    | 120.55                |
| 26  | B (C24, C23) | 1.39                  | 26  | A (O12, S10, N13) | 106.99                |
| 27  | B (C25, C21) | 1.51                  | 27  | A (O11, S10, N13) | 106.81                |
| 28  | B (C26, C24) | 1.40                  | 28  | A (O11, S10, O12) | 122.85                |
| 29  | B (C26, C20) | 1.39                  | 29  | A (C0, S10, N13)  | 103.35                |
| 30  | B (C27, C25) | 1.55                  | 30  | A (C0, S10, O12)  | 107.44                |
| 31  | B (C27, N19) | 1.48                  | 31  | A (C0, S10, O11)  | 107.78                |
| 32  | B (O28, C18) | 1.22                  | 32  | A (H14, N13, H15) | 111.84                |
| 33  | B (H29, C1)  | 1.08                  | 33  | A (S10, N13, H15) | 110.11                |
| 34  | B (H30, C7)  | 1.08                  | 34  | A (S10, N13, H14) | 110.21                |
| 35  | B (H31, C9)  | 1.08                  | 35  | A (N4, C16, C17)  | 112.02                |
| 36  | B (H32, C16) | 1.09                  | 36  | A (N4, C16, H33)  | 108.43                |
| 37  | B (H33, C16) | 1.09                  | 37  | A (C17, C16, H32) | 110.37                |
| 38  | B (H34, C17) | 1.09                  | 38  | A (N4, C16, H32)  | 108.44                |
| 39  | B (H35, C17) | 1.10                  | 39  | A (H32, C16, H33) | 107.27                |
| 40  | B (H36, C22) | 1.09                  | 40  | A (C17, C16, H33) | 110.16                |
| 41  | B (H37, C23) | 1.08                  | 41  | A (C16, C17, H35) | 109.80                |
| 42  | B (H38, C24) | 1.08                  | 42  | A (C16, C17, H34) | 109.37                |
| 43  | B (H39, C25) | 1.09                  | 43  | A (C16, C17, C18) | 110.68                |
| 44  | B (H40, C25) | 1.10                  | 44  | A (C18, C17, H35) | 108.60                |
| 45  | B (H41, C26) | 1.08                  | 45  | A (H34, C17, H35) | 106.67                |
| 46  | B (H42, C27) | 1.09                  | 46  | A (C18, C17, H34) | 111.62                |

|    |              |      |    |                   |        |
|----|--------------|------|----|-------------------|--------|
| 47 | B (H43, C27) | 1.09 | 47 | A (C17, C18, N19) | 116.05 |
|    |              |      | 48 | A (N19, C18, O28) | 123.08 |
|    |              |      | 49 | A (C17, C18, O28) | 120.87 |
|    |              |      | 50 | A (C20, N19, C27) | 109.62 |
|    |              |      | 51 | A (C18, N19, C27) | 124.59 |
|    |              |      | 52 | A (C18, N19, C20) | 125.51 |
|    |              |      | 53 | A (C21, C20, C26) | 121.20 |
|    |              |      | 54 | A (N19, C20, C21) | 109.83 |
|    |              |      | 55 | A (N19, C20, C26) | 128.96 |
|    |              |      | 56 | A (C22, C21, C25) | 129.42 |
|    |              |      | 57 | A (C20, C21, C25) | 110.19 |
|    |              |      | 58 | A (C20, C21, C22) | 120.36 |
|    |              |      | 59 | A (C21, C22, C23) | 119.18 |
|    |              |      | 60 | A (C23, C22, H36) | 120.43 |
|    |              |      | 61 | A (C21, C22, H36) | 120.39 |
|    |              |      | 62 | A (C22, C23, C24) | 120.00 |
|    |              |      | 63 | A (C24, C23, H37) | 120.06 |
|    |              |      | 64 | A (C22, C23, H37) | 119.94 |
|    |              |      | 65 | A (C23, C24, C26) | 121.51 |
|    |              |      | 66 | A (C26, C24, H38) | 118.82 |
|    |              |      | 67 | A (C23, C24, H38) | 119.67 |
|    |              |      | 68 | A (C21, C25, C27) | 103.53 |
|    |              |      | 69 | A (C27, C25, H40) | 111.00 |
|    |              |      | 70 | A (C21, C25, H40) | 110.79 |
|    |              |      | 71 | A (C27, C25, H39) | 111.46 |
|    |              |      | 72 | A (C21, C25, H39) | 112.86 |
|    |              |      | 73 | A (H39, C25, H40) | 107.26 |
|    |              |      | 74 | A (C20, C26, C24) | 117.74 |
|    |              |      | 75 | A (C24, C26, H41) | 121.79 |
|    |              |      | 76 | A (C20, C26, H41) | 120.47 |
|    |              |      | 77 | A (N19, C27, C25) | 104.99 |
|    |              |      | 78 | A (H42, C27, H43) | 108.13 |
|    |              |      | 79 | A (C25, C27, H43) | 111.23 |
|    |              |      | 80 | A (N19, C27, H43) | 109.69 |
|    |              |      | 81 | A (C25, C27, H42) | 112.08 |
|    |              |      | 82 | A (N19, C27, H42) | 110.71 |

**Table S9.** Cartesian coordinates (Å) of ZINC58324738 after DFT optimization.

| Atom Number | Element | X         | Y        | Z         |
|-------------|---------|-----------|----------|-----------|
| 1           | N       | -2.685425 | 4.320410 | 12.858553 |
| 2           | C       | -3.733304 | 3.274254 | 12.891606 |
| 3           | C       | -4.831087 | 3.452227 | 13.924990 |
| 4           | C       | -5.788692 | 4.476022 | 13.754100 |
| 5           | C       | -6.828423 | 4.595690 | 14.686230 |
| 6           | C       | -6.928399 | 3.724267 | 15.766302 |
| 7           | C       | -5.985201 | 2.712679 | 15.931564 |
| 8           | C       | -5.695827 | 5.400697 | 12.593343 |
| 9           | C       | -4.451627 | 5.950243 | 12.216539 |
| 10          | C       | -4.382139 | 6.791895 | 11.104810 |
| 11          | C       | -5.522120 | 7.107764 | 10.369458 |
| 12          | C       | -6.753249 | 6.576524 | 10.746159 |
| 13          | C       | -6.835446 | 5.728714 | 11.846553 |
| 14          | C       | -4.946463 | 2.584053 | 15.012709 |
| 15          | C       | -3.222013 | 5.680873 | 13.055166 |
| 16          | C       | -1.465467 | 4.043982 | 13.641845 |
| 17          | C       | -1.473516 | 4.405235 | 15.134527 |
| 18          | C       | -0.209501 | 4.655657 | 12.952787 |
| 19          | N       | -0.393288 | 4.809432 | 11.586262 |
| 20          | H       | -1.347968 | 4.598825 | 11.305063 |
| 21          | C       | 0.514404  | 5.339051 | 10.649990 |
| 22          | O       | 1.589489  | 5.814546 | 10.914816 |
| 23          | N       | -0.007204 | 5.299509 | 9.363099  |
| 24          | H       | 0.671452  | 5.522423 | 8.650641  |
| 25          | H       | -0.658505 | 4.568430 | 9.119196  |
| 26          | O       | 0.800948  | 4.896509 | 13.565209 |
| 27          | H       | -4.200274 | 3.246914 | 11.901366 |
| 28          | H       | -3.239784 | 2.311337 | 13.034879 |
| 29          | H       | -7.554034 | 5.393388 | 14.570564 |
| 30          | H       | -7.737371 | 3.838470 | 16.479260 |
| 31          | H       | -6.057935 | 2.027698 | 16.768971 |
| 32          | H       | -3.423300 | 7.213650 | 10.820078 |
| 33          | H       | -5.449298 | 7.766615 | 9.511399  |
| 34          | H       | -7.647021 | 6.813709 | 10.179727 |
| 35          | H       | -7.790649 | 5.294475 | 12.120623 |
| 36          | H       | -4.219460 | 1.786759 | 15.134417 |
| 37          | H       | -3.479931 | 5.857210 | 14.108844 |
| 38          | H       | -2.437598 | 6.396042 | 12.793185 |
| 39          | H       | -1.303116 | 2.962067 | 13.561139 |
| 40          | H       | -0.533335 | 4.085403 | 15.583715 |
| 41          | H       | -2.301490 | 3.912952 | 15.648559 |
| 42          | H       | -1.553833 | 5.482399 | 15.292755 |

**Table S10.** Bond parameters of ZINC58324738 after DFT optimization.

| No. | Definition   | Bond length<br>(in Å) | No. | Definition        | Bond angles<br>(in °) |
|-----|--------------|-----------------------|-----|-------------------|-----------------------|
| 1   | B (C1, N0)   | 1.48                  | 1   | A (C1, N0, C15)   | 116.15                |
| 2   | B (C2, C1)   | 1.52                  | 2   | A (C1, N0, C14)   | 113.02                |
| 3   | B (C3, C2)   | 1.41                  | 3   | A (C14, N0, C15)  | 113.74                |
| 4   | B (C4, C3)   | 1.40                  | 4   | A (C2, C1, H26)   | 108.06                |
| 5   | B (C5, C4)   | 1.39                  | 5   | A (N0, C1, C2)    | 116.36                |
| 6   | B (C6, C5)   | 1.39                  | 6   | A (H26, C1, H27)  | 106.83                |
| 7   | B (C7, C3)   | 1.49                  | 7   | A (C2, C1, H27)   | 109.94                |
| 8   | B (C8, C7)   | 1.41                  | 8   | A (N0, C1, H27)   | 107.83                |
| 9   | B (C9, C8)   | 1.40                  | 9   | A (N0, C1, H26)   | 107.41                |
| 10  | B (C10, C9)  | 1.39                  | 10  | A (C1, C2, C3)    | 119.54                |
| 11  | B (C11, C10) | 1.39                  | 11  | A (C3, C2, C13)   | 119.27                |
| 12  | B (C12, C11) | 1.39                  | 12  | A (C1, C2, C13)   | 121.14                |
| 13  | B (C12, C7)  | 1.40                  | 13  | A (C2, C3, C7)    | 120.19                |
| 14  | B (C13, C6)  | 1.39                  | 14  | A (C4, C3, C7)    | 120.83                |
| 15  | B (C13, C2)  | 1.40                  | 15  | A (C2, C3, C4)    | 118.98                |
| 16  | B (C14, C8)  | 1.51                  | 16  | A (C5, C4, H28)   | 119.69                |
| 17  | B (C14, N0)  | 1.48                  | 17  | A (C3, C4, H28)   | 119.22                |
| 18  | B (C15, N0)  | 1.48                  | 18  | A (C3, C4, C5)    | 121.07                |
| 19  | B (C16, C15) | 1.54                  | 19  | A (C6, C5, H29)   | 120.24                |
| 20  | B (C17, C15) | 1.56                  | 20  | A (C4, C5, H29)   | 119.87                |
| 21  | B (N18, C17) | 1.39                  | 21  | A (C4, C5, C6)    | 119.89                |
| 22  | B (H19, N18) | 1.02                  | 22  | A (C5, C6, H30)   | 120.33                |
| 23  | B (C20, N18) | 1.41                  | 23  | A (C13, C6, H30)  | 120.08                |
| 24  | B (O21, C20) | 1.21                  | 24  | A (C5, C6, C13)   | 119.59                |
| 25  | B (N22, C20) | 1.39                  | 25  | A (C3, C7, C12)   | 120.71                |
| 26  | B (H23, N22) | 1.01                  | 26  | A (C8, C7, C12)   | 118.91                |
| 27  | B (H24, N22) | 1.01                  | 27  | A (C3, C7, C8)    | 120.37                |
| 28  | B (O25, C17) | 1.21                  | 28  | A (C9, C8, C14)   | 120.56                |
| 29  | B (H26, C1)  | 1.10                  | 29  | A (C7, C8, C14)   | 119.95                |
| 30  | B (H27, C1)  | 1.09                  | 30  | A (C7, C8, C9)    | 119.42                |
| 31  | B (H28, C4)  | 1.08                  | 31  | A (C10, C9, H31)  | 119.76                |
| 32  | B (H29, C5)  | 1.08                  | 32  | A (C8, C9, H31)   | 119.15                |
| 33  | B (H30, C6)  | 1.08                  | 33  | A (C8, C9, C10)   | 121.09                |
| 34  | B (H31, C9)  | 1.09                  | 34  | A (C11, C10, H32) | 120.34                |
| 35  | B (H32, C10) | 1.08                  | 35  | A (C9, C10, H32)  | 120.04                |
| 36  | B (H33, C11) | 1.08                  | 36  | A (C9, C10, C11)  | 119.61                |
| 37  | B (H34, C12) | 1.08                  | 37  | A (C10, C11, H33) | 120.25                |
| 38  | B (H35, C13) | 1.09                  | 38  | A (C10, C11, C12) | 119.90                |
| 39  | B (H36, C14) | 1.10                  | 39  | A (C12, C11, H33) | 119.84                |
| 40  | B (H37, C14) | 1.09                  | 40  | A (C7, C12, H34)  | 119.20                |
| 41  | B (H38, C15) | 1.10                  | 41  | A (C7, C12, C11)  | 121.06                |
| 42  | B (H39, C16) | 1.09                  | 42  | A (C11, C12, H34) | 119.72                |
| 43  | B (H40, C16) | 1.09                  | 43  | A (C2, C13, H35)  | 119.24                |
| 44  | B (H41, C16) | 1.09                  | 44  | A (C2, C13, C6)   | 121.20                |
|     |              |                       | 45  | A (C6, C13, H35)  | 119.55                |
|     |              |                       | 46  | A (C8, C14, H36)  | 108.19                |



---

|    |                   |        |
|----|-------------------|--------|
| 47 | A (N0, C14, H36)  | 111.16 |
| 48 | A (C8, C14, H37)  | 109.51 |
| 49 | A (N0, C14, C8)   | 112.70 |
| 50 | A (H36, C14, H37) | 107.05 |
| 51 | A (N0, C14, H37)  | 108.07 |
| 52 | A (C16, C15, C17) | 109.99 |
| 53 | A (C17, C15, H38) | 103.62 |
| 54 | A (N0, C15, C17)  | 110.99 |
| 55 | A (N0, C15, C16)  | 117.87 |
| 56 | A (C16, C15, H38) | 107.71 |
| 57 | A (N0, C15, H38)  | 105.55 |
| 58 | A (H39, C16, H41) | 107.05 |
| 59 | A (C15, C16, H41) | 111.92 |
| 60 | A (H39, C16, H40) | 109.14 |
| 61 | A (C15, C16, H40) | 110.82 |
| 62 | A (C15, C16, H39) | 109.09 |
| 63 | A (H40, C16, H41) | 108.71 |
| 64 | A (C15, C17, N18) | 111.87 |
| 65 | A (N18, C17, O25) | 126.09 |
| 66 | A (C15, C17, O25) | 121.97 |
| 67 | A (C17, N18, C20) | 127.69 |
| 68 | A (C17, N18, H19) | 111.94 |
| 69 | A (H19, N18, C20) | 119.95 |
| 70 | A (O21, C20, N22) | 123.36 |
| 71 | A (N18, C20, N22) | 111.31 |
| 72 | A (N18, C20, O21) | 125.29 |
| 73 | A (H23, N22, H24) | 115.06 |
| 74 | A (C20, N22, H24) | 119.14 |
| 75 | A (C20, N22, H23) | 113.29 |

---

## References

1. Duffel, M.W.; Ing, I.S.; Segarra, T.M.; Dixson, J.A.; Barfknecht, C.F.; Schoenwald, R.D. N-Substituted sulfonamide carbonic anhydrase inhibitors with topical effects on intraocular pressure. *J. Med. Chem.* **1986**, *29*, 1488–1494, doi:10.1021/jm00158a028.
2. Carta, F.; Ferraroni, M.; Scozzafava, A.; Supuran, C.T. Fluorescent sulfonamide carbonic anhydrase inhibitors incorporating 1,2,3-triazole moieties: Kinetic and X-ray crystallographic studies. *Bioorg. Med. Chem.* **2016**, *24*, 104–112, doi:https://doi.org/10.1016/j.bmc.2015.11.031.
3. Temperini, C.; Cecchi, A.; Scozzafava, A.; Supuran, C.T. Carbonic anhydrase inhibitors. Interaction of indapamide and related diuretics with 12 mammalian isozymes and X-ray crystallographic studies for the indapamide–isozyme II adduct. *Bioorg. Med. Chem. Lett.* **2008**, *18*, 2567–2573, doi:https://doi.org/10.1016/j.bmcl.2008.03.051.
4. Scozzafava, A.; Menabuoni, L.; Mincione, F.; Briganti, F.; Mincione, G.; Supuran, C.T. Carbonic Anhydrase Inhibitors: Perfluoroalkyl/Aryl-Substituted Derivatives of Aromatic/Heterocyclic Sulfonamides as Topical Intraocular Pressure-Lowering Agents

- with Prolonged Duration of Action. *J. Med. Chem.* **2000**, *43*, 4542–4551, doi:10.1021/jm000296j.
5. Vullo, D.; Voipio, J.; Innocenti, A.; Rivera, C.; Ranki, H.; Scozzafava, A.; Kaila, K.; Supuran, C.T. Carbonic anhydrase inhibitors. Inhibition of the human cytosolic isozyme VII with aromatic and heterocyclic sulfonamides. *Bioorg. Med. Chem. Lett.* **2005**, *15*, 971–976, doi:https://doi.org/10.1016/j.bmcl.2004.12.052.
  6. Güzel-Akdemir, Ö.; Akdemir, A.; Isik, S.; Vullo, D.; Supuran, C.T. o-Benzenedisulfonimido-sulfonamides are potent inhibitors of the tumor-associated carbonic anhydrase isoforms CA IX and CA XII. *Bioorg. Med. Chem.* **2013**, *21*, 1386–1391, doi:https://doi.org/10.1016/j.bmc.2012.12.037.
  7. Temperini, C.; Innocenti, A.; Scozzafava, A.; Supuran, C.T. Carbonic anhydrase inhibitors. Interaction of the antitumor sulfamate EMD 486019 with twelve mammalian carbonic anhydrase isoforms: Kinetic and X-ray crystallographic studies. *Bioorg. Med. Chem. Lett.* **2008**, *18*, 4282–4286, doi:https://doi.org/10.1016/j.bmcl.2008.06.105.
